# Supplementary material
Source: HighWire-hosted journal article supplement (https://ez-admanager.com/highwire/filestream/135909/field_highwire_adjunct_files/0/tholfsen_162.pdf)
Supplement: tholfsen_162.pdf [file tholfsen_162.pdf]

# 조기 파킨슨병 환자에서 주간과다졸림증의 진행

## Development of excessive daytime sleepiness in early Parkinson disease

Lena K. Tholfsen, MD  
 Jan P. Larsen, MD, PhD  
 Jörn Schulz, PhD  
 Ole-Bjorn Tysnes, MD, PhD  
 Michaela D. Gjerstad, MD,  
 PhD

**목적:** 약을 한 번도 사용하지 않은 파킨슨병(Parkinson's disease, PD) 환자에게 있어서 진단 후 첫 5년 동안 주간과다졸림증(excessive daytime sleepiness, EDS)의 빈도, 발생률, 위험인자를 알아보려고 하였다.

**방법:** 인구 기반 코호트에서 153명의 약을 한 번도 먹지 않은 조기 PD 환자와 169명의 대조군에서 EDS를 평가하고 1, 3, 5년의 약물 치료 뒤 이를 재평가하였다. EDS는 Epworth 졸음 척도를 이용하여 진단되었다. EDS의 기준점은 10점 이상으로 하였다. 연관된 자료를 위한 일반화 추정 방정식 모델을 이용하여 EDS와 관련 있는 위험인자들을 찾아보았다.

**결과:** 대조군과 비교하여 PD 환자들은 진단 시와 추적 검사 기간 동안 더 자주 EDS를 호소하였다. PD 환자군에서 EDS의 빈도는 진단시 11.8%에서 5년 뒤 23.4%로 증가하였다. 이와 관련된 인자들은 남성, 도파민 길항제의 사용, 높은 Montgomery-Åsberg 우울증 평가 척도와 통합 파킨슨병 통합 척도(Unified Parkinson's Disease Rating Scale, UPDRS) - 일상생활능력 지수였다. EDS 발생과 관련된 주요 위험인자는 진단시 높은 Epworth 졸음 척도이었다.

**결론:** EDS는 PD 환자 진단시 약물 사용 이전부터 대조군에 비해 높은 빈도를 보이고, 질병의 진행에 따라 증가하는 양상을 보인다. 시간에 따른 EDS 발생의 주요 위험인자는 조기 발생하는 졸음 경향이었다. 또한, 도파민 길항제의 사용은 EDS의 발생과 관련이 있었다. 이러한 사실들은 조기에 졸음 경향을 보이는 PD 환자에게 도파민 길항제를 사용하는 경우 주의가 필요함을 시사한다.

Neurology® 2015;85:162-168

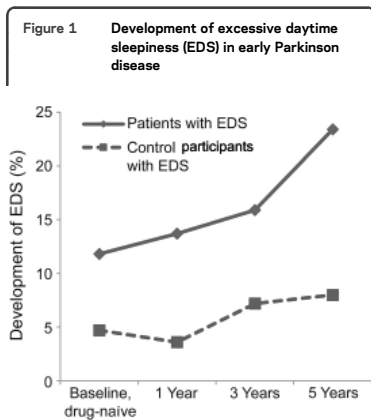

**Table 3** Risk-factor analysis of the development of EDS in newly diagnosed patients with PD

| Measure                 | Unadjusted model <sup>a</sup> |               |       |                    | Adjusted model <sup>b</sup> |               |       |                    | Final model <sup>c</sup> |               |       |                    |
|-------------------------|-------------------------------|---------------|-------|--------------------|-----------------------------|---------------|-------|--------------------|--------------------------|---------------|-------|--------------------|
|                         | OR                            | 95% CI for OR |       |                    | OR                          | 95% CI for OR |       |                    | OR                       | 95% CI for OR |       |                    |
| Male sex                | 2.750                         | 1.184         | 6.390 | 0.019 <sup>d</sup> | 2.019                       | 0.755         | 5.399 | 0.161              | 2.092                    | 0.913         | 4.791 | 0.081              |
| PIGD phenotype          | 1.002                         | 0.447         | 2.246 | 0.996              | 1.025                       | 0.431         | 2.439 | 0.955              |                          |               |       |                    |
| Insomnia                | -0.962                        | 2.230         | 0.415 | 0.927              | -0.533                      | 1.514         | .187  | 0.237              |                          |               |       |                    |
| Age                     | 0.956                         | 0.924         | 0.990 | 0.011 <sup>d</sup> | 0.967                       | 0.925         | 1.011 | 0.140              | 0.972                    | 0.935         | 1.010 | 0.145              |
| ESS score               | 1.487                         | 1.232         | 1.795 | 0.000 <sup>d</sup> | 1.532                       | 1.238         | 1.894 | 0.000 <sup>d</sup> | 1.435                    | 1.182         | 1.743 | 0.000 <sup>d</sup> |
| UPDRS-ADL score         | 1.025                         | 0.916         | 1.148 | 0.665              | 1.048                       | 0.904         | 1.216 | 0.533              |                          |               |       |                    |
| UPDRS-motor score       | 1.006                         | 0.970         | 1.044 | 0.731              | 1.015                       | 0.958         | 1.076 | 0.608              |                          |               |       |                    |
| MADRS score             | 1.020                         | 0.927         | 1.124 | 0.681              | 0.998                       | 0.895         | 1.113 | 0.972              |                          |               |       |                    |
| MMSE score              | 1.045                         | 0.911         | 1.200 | 0.527              | 0.950                       | 0.796         | 1.135 | 0.574              |                          |               |       |                    |
| Follow-up time in years | 1.213                         | 1.030         | 1.430 | 0.021 <sup>d</sup> | 1.264                       | 1.039         | 1.537 | 0.019 <sup>d</sup> | 1.256                    | 1.039         | 1.517 | 0.018 <sup>d</sup> |

Abbreviations: ADL = activities of daily living; CI = confidence interval; EDS = excessive daytime sleepiness; ESS = Epworth Sleepiness Scale; MADRS = Montgomery-Åsberg Depression Rating Scale; MMSE = Mini-Mental State Examination; OR = odds ratio; PD = Parkinson disease; PIGD = postural instability-gait disorder; UPDRS = Unified Parkinson's Disease Rating Scale.

<sup>a</sup>The unadjusted relationship between ESS and the covariates was analyzed including only one covariate at a time.

<sup>b</sup>The adjusted relationship includes all main effects.

<sup>c</sup>The finally adjusted relationship includes selected main effects by stepwise exclusion based on the significance value.

<sup>d</sup>Significant values.
